# Supplementary material for: Quorum Sensing Inhibition and Structure–Activity Relationships of β-Keto Esters
Source: MDPI journal article supplement (doi:10.3390/molecules21080971), 2016-07-25
Supplement: s1 [file s1]

# Supplementary Materials: Quorum Sensing Inhibition and Structure Activity Relationships of $\beta$ -Keto Esters

Stephanie Forschner-Dancause, Emily Poulin and Susan Meschwitz

## HPLC Analysis of $\beta$ -Keto Esters

The reversed-phase HPLC analysis was carried out using a Phenomenex Luna C18 (250 mm  $\times$  4.6 mm, 5  $\mu$ m) column. A linear gradient chromatographic technique was used at room temperature with the following solvent system for all compounds except **24** and **25**: solvent A = 0.1% trifluoroacetic acid; solvent B = methanol; starting at 65% A:35% B and ending 20 m later with 0% A:100% B and a flow rate set at 1 mL/min. For compounds **24** and **25**, an isocratic mobile phase consisting of water and 2-propanol (50:50 v/v) was used. The detection of compounds was carried out at 254 nm.

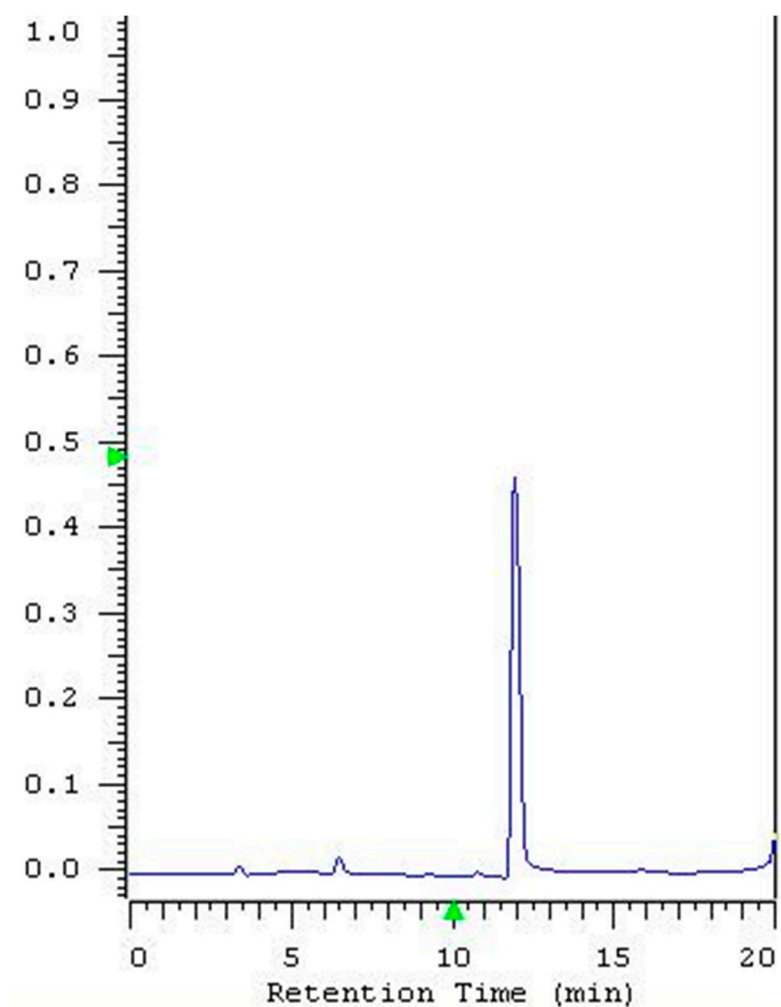

Figure S1. HPLC profile of compound **9** ethyl benzoyl acetate.

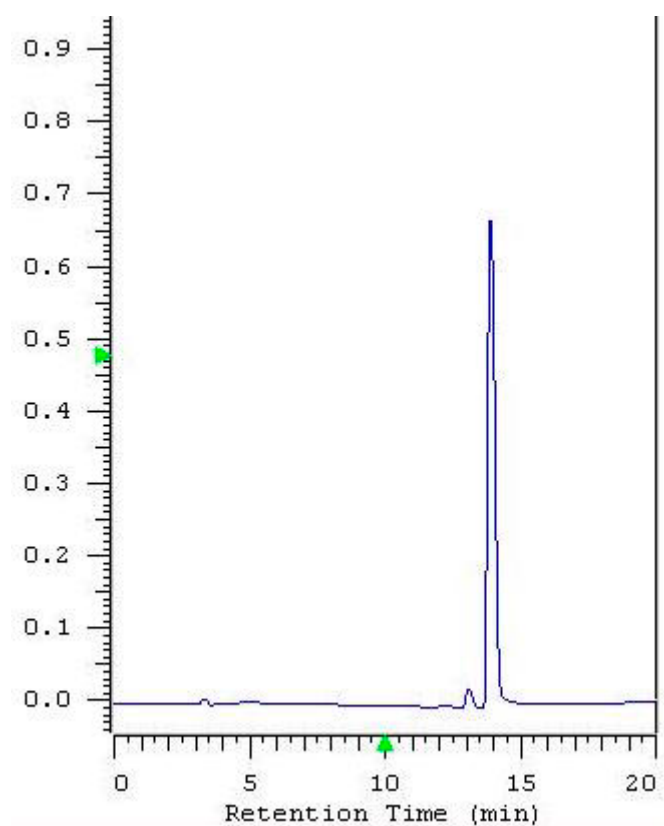

**Figure S2.** HPLC profile of compound **14** ethyl (4-methylbenzoyl) acetate.

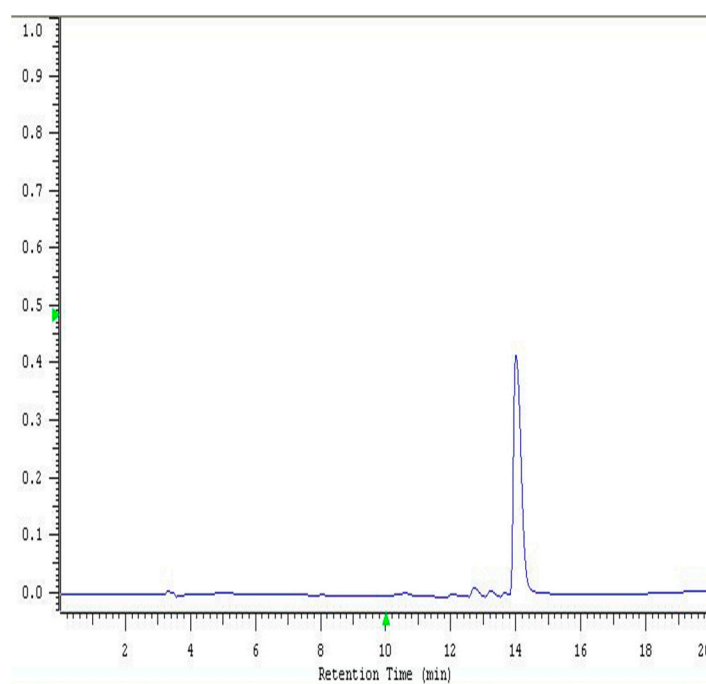

**Figure S3.** HPLC profile of compound **15** ethyl (3-methylbenzoyl) acetate.

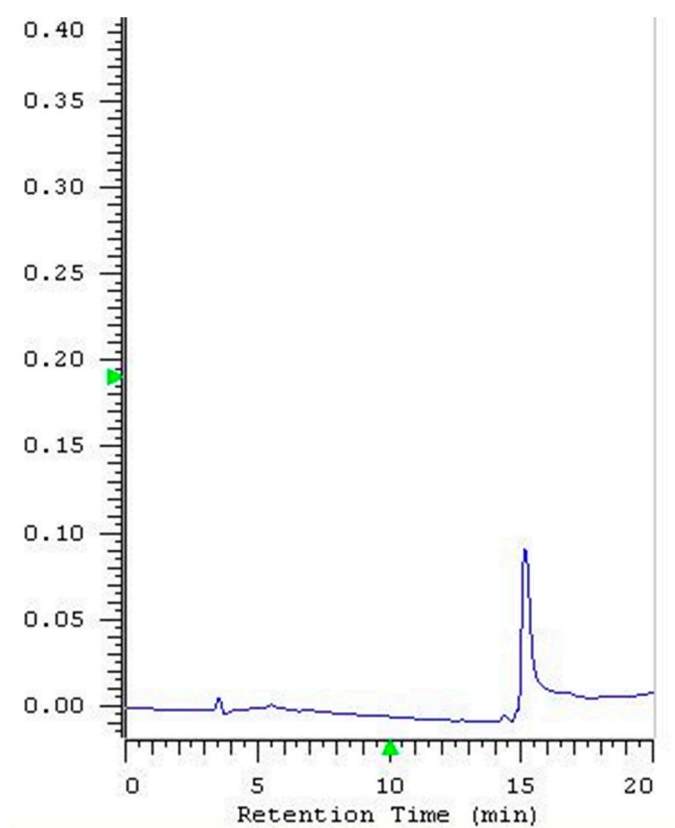

**Figure S4.** HPLC profile of compound **16** ethyl (4-trifluoromethylbenzoyl) acetate.

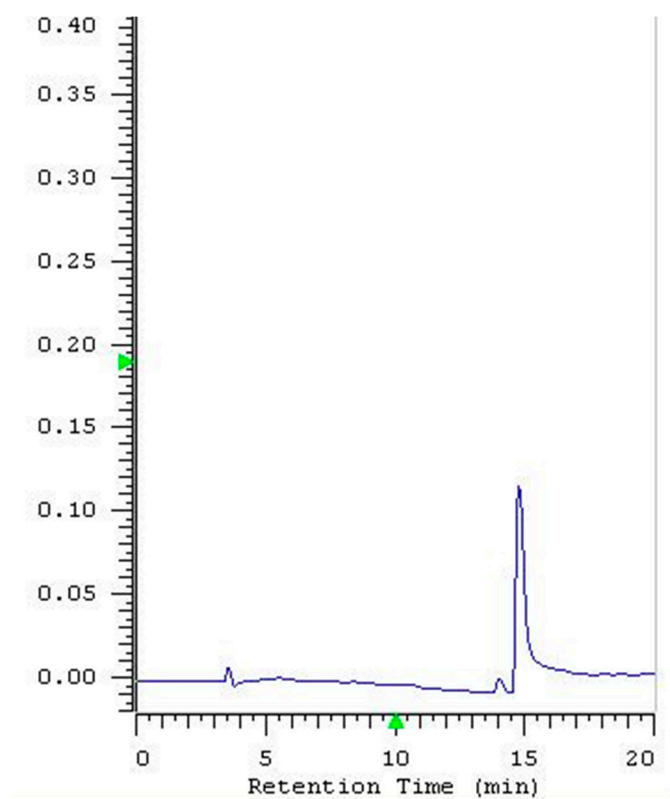

**Figure S5.** HPLC profile of compound **17** ethyl (3-trifluoromethylbenzoyl) acetate.

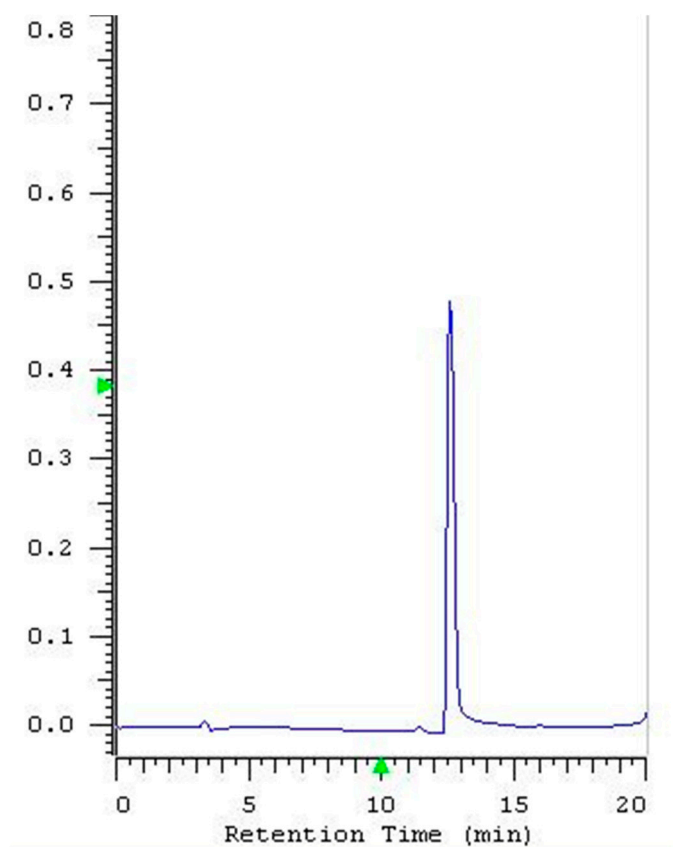

**Figure S6.** HPLC profile of compound 18 ethyl (4-fluorobenzoyl) acetate.

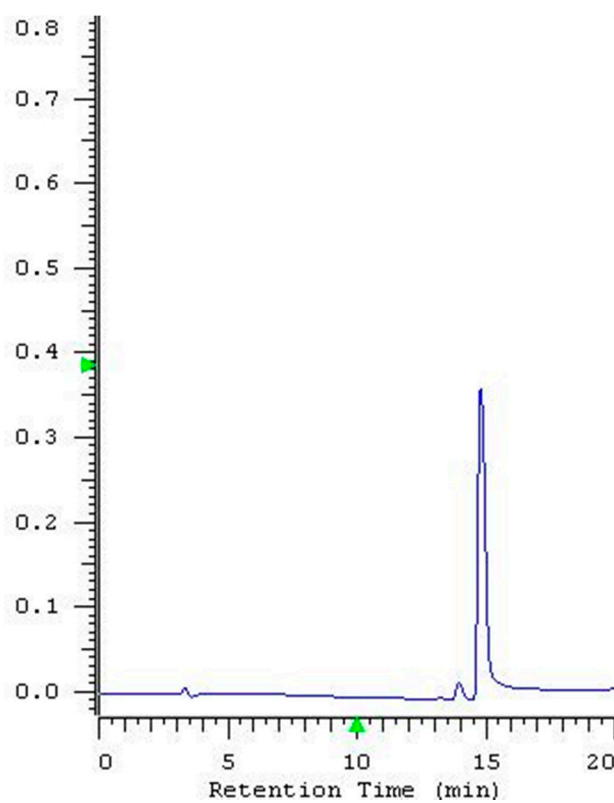

**Figure S7.** HPLC profile of compound 19 ethyl (4-chlorobenzoyl) acetate.

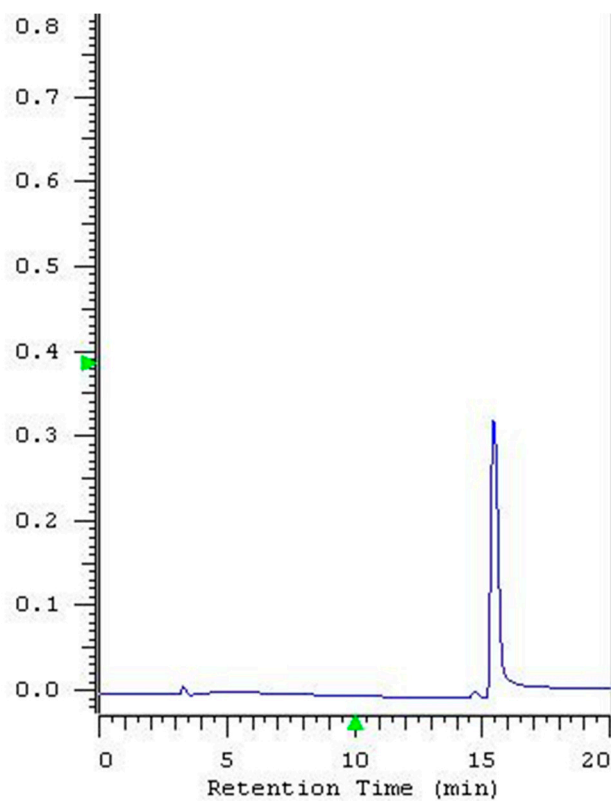

**Figure S8.** HPLC profile of compound **20** ethyl (4-bromobenzoyl) acetate.

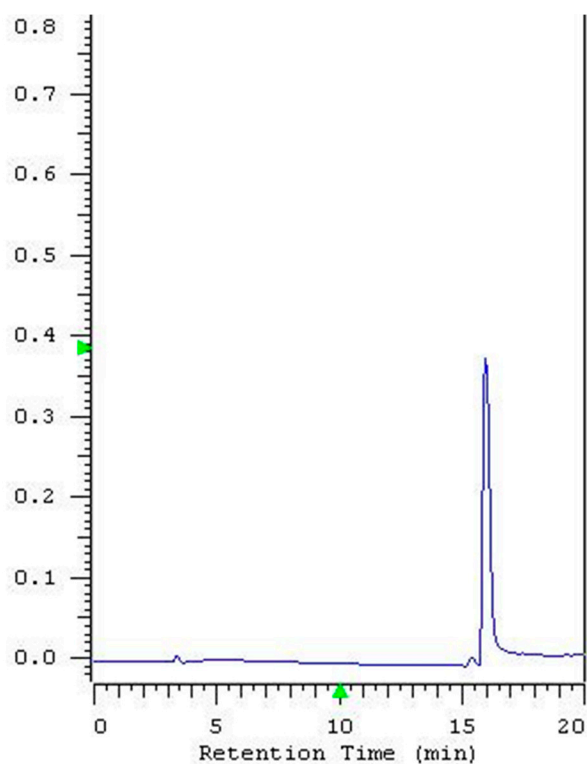

**Figure S9.** HPLC profile of compound **21** ethyl (4-iodobenzoyl) acetate.

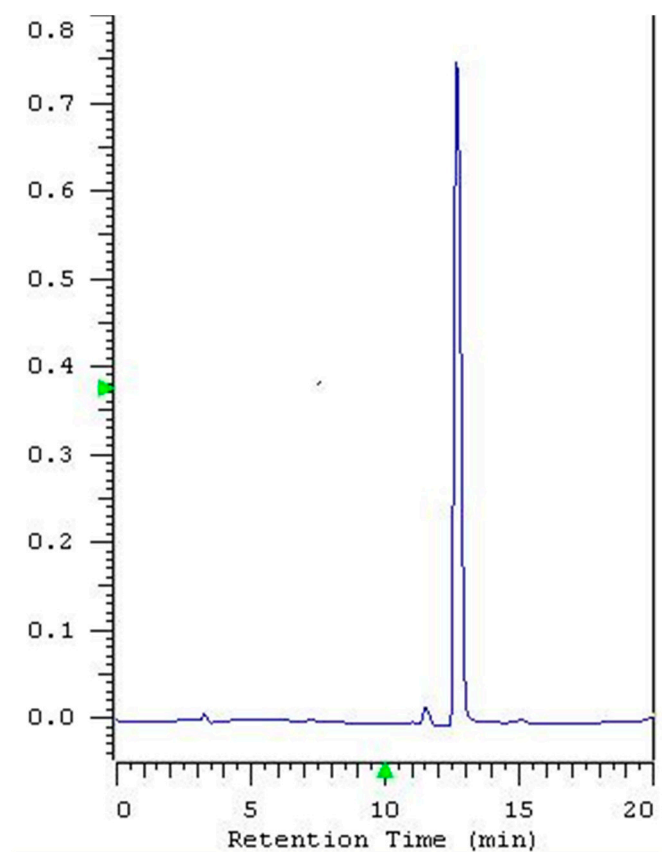

**Figure S10.** HPLC profile of compound **22** ethyl (4-methoxybenzoyl) acetate.

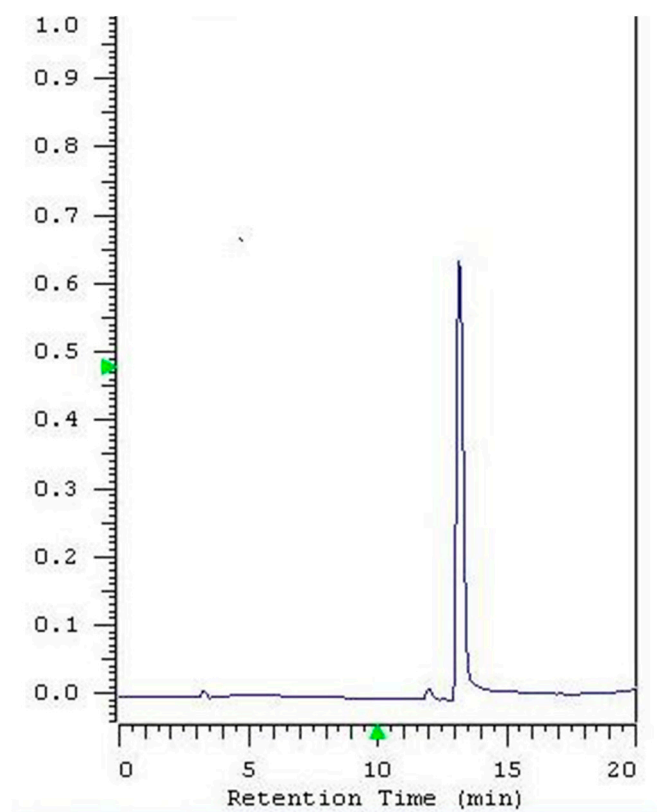

**Figure S11.** HPLC profile of compound **23** ethyl (3-methoxybenzoyl) acetate.

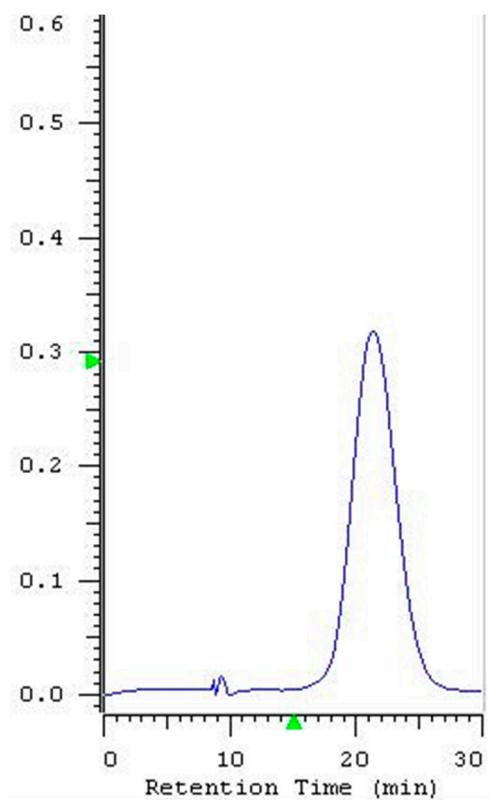

**Figure S12.** HPLC profile of compound 24 ethyl (4-nitrobenzoyl) acetate.

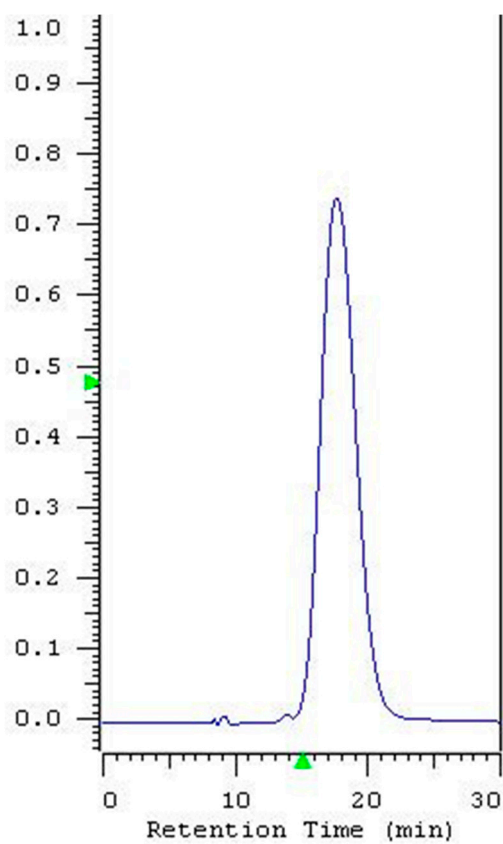

**Figure S13.** HPLC profile of compound 25 ethyl (3-nitrobenzoyl) acetate.

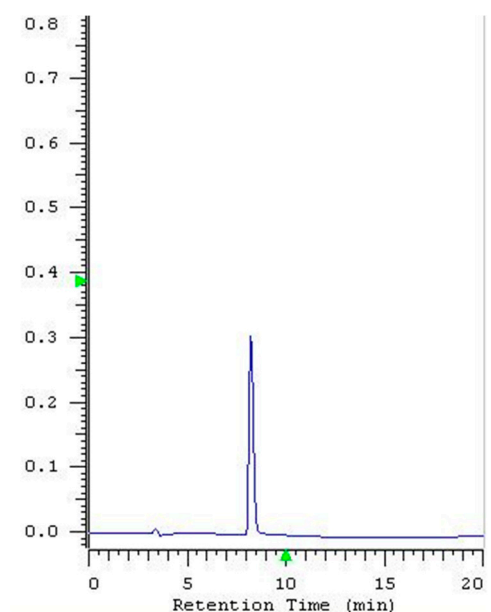

**Figure S14.** HPLC profile of compound **26** methyl 3-(4-hydroxyphenyl)-3-oxo-propanoate.

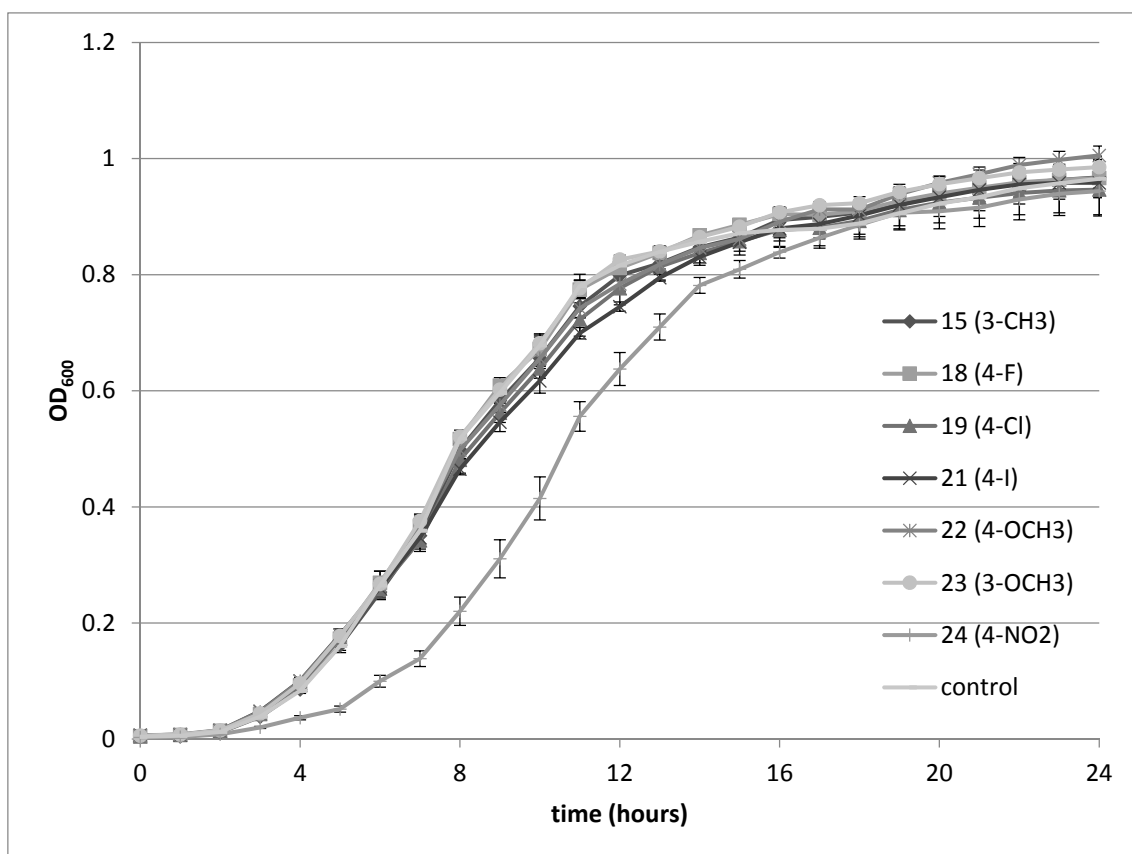

**Figure S15.** Growth of *V. harveyi* BB120 monitored by optical density at 600 nm for 24 h. Cultures were treated with active  $\beta$ -keto ester analogs at their  $IC_{50}$  concentrations. Control contains same concentration of DMSO as treatment but with no added compound. Error bars represent standard deviation of replicates.



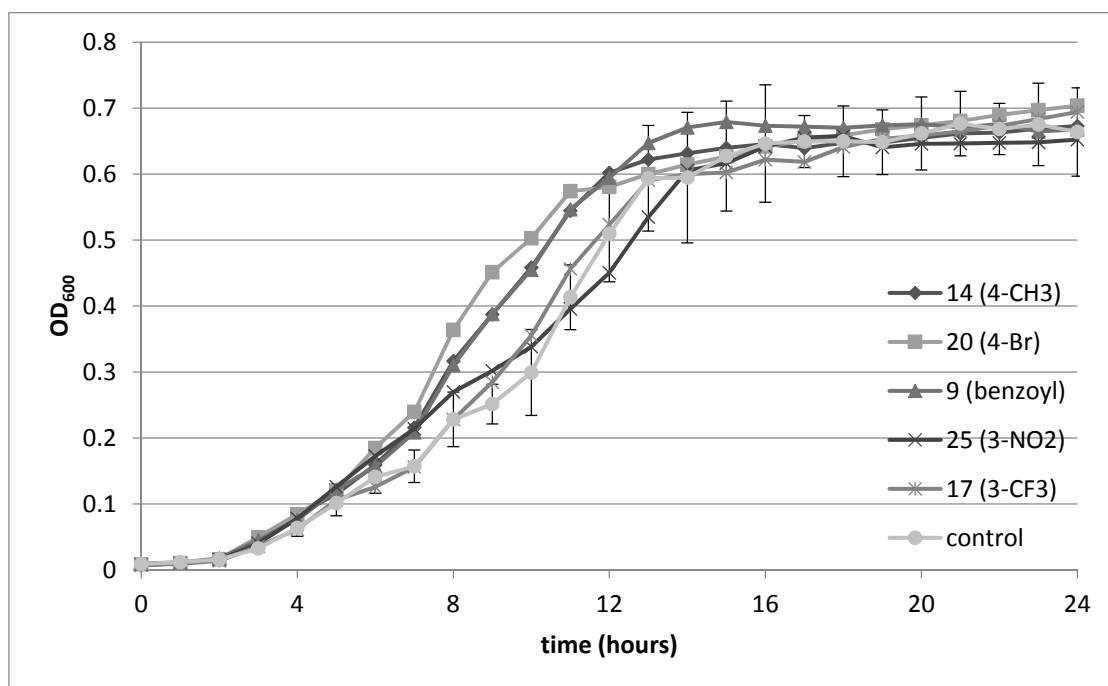

**Figure S16.** Growth of *V. harveyi* BB120 monitored by optical density at 600 nm for 24 h. Cultures were treated with active  $\beta$ -keto ester analogs at their  $IC_{50}$  concentrations. Control contains same concentration of DMSO as treatment but with no added compound. Error bars represent standard deviation of replicates and are shown for control only to simplify figure.

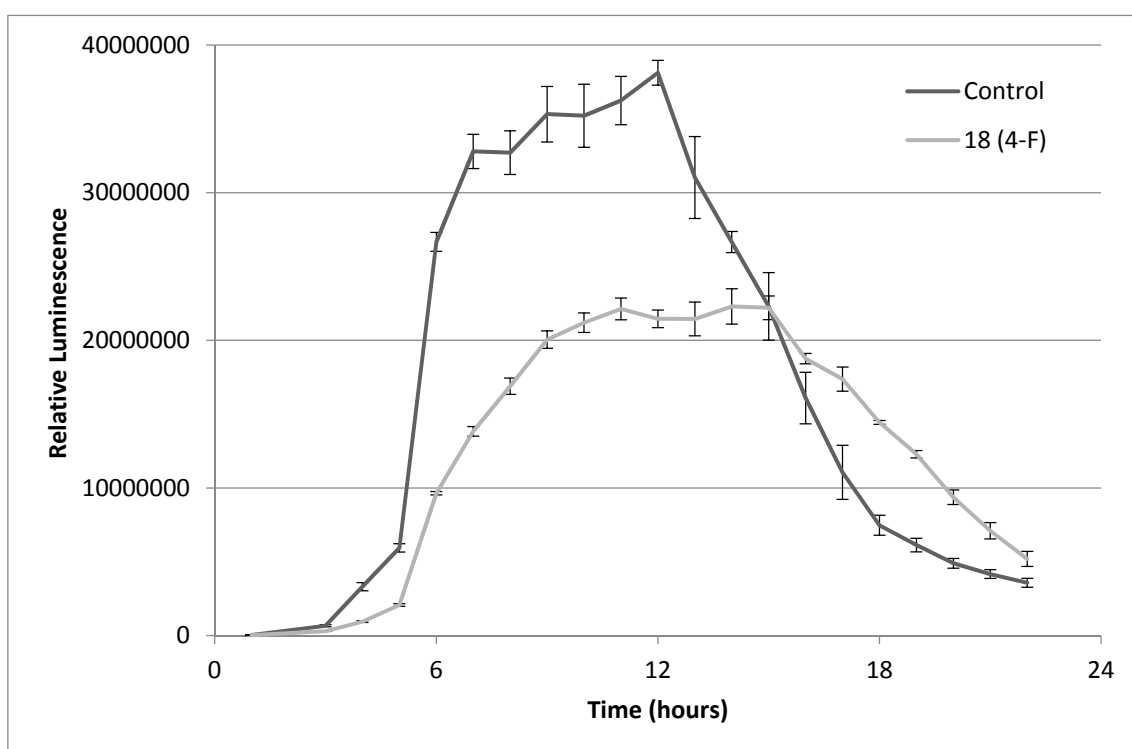

**Figure S17.** Luminescence by *V. harveyi* BB120 with and without 250  $\mu$ M ethyl (4-fluorobenzoyl) acetate (18). Control contains same concentration of DMSO as treatment but with no added compound. Error bars represent standard deviation of replicates.
